# Supplementary material
Source: publisher figshare collection journal article supplement (https://gsajournals.figshare.com/articles/dataset/_/12475901)
Supplement: Supplementary file 1 [file 1]

A

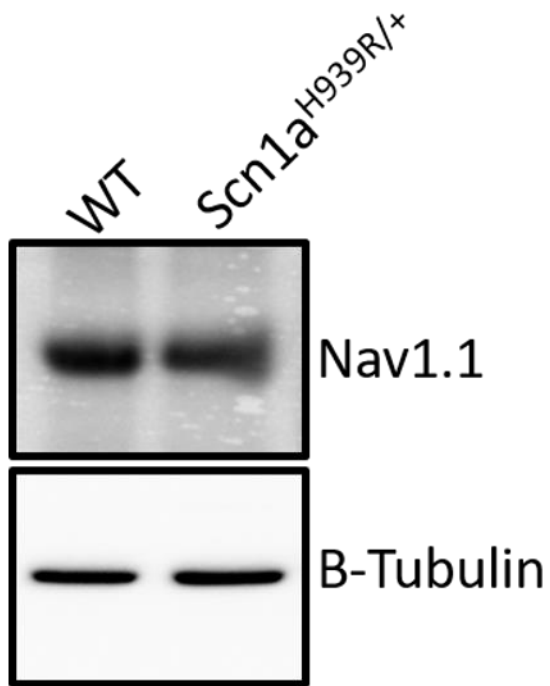

B

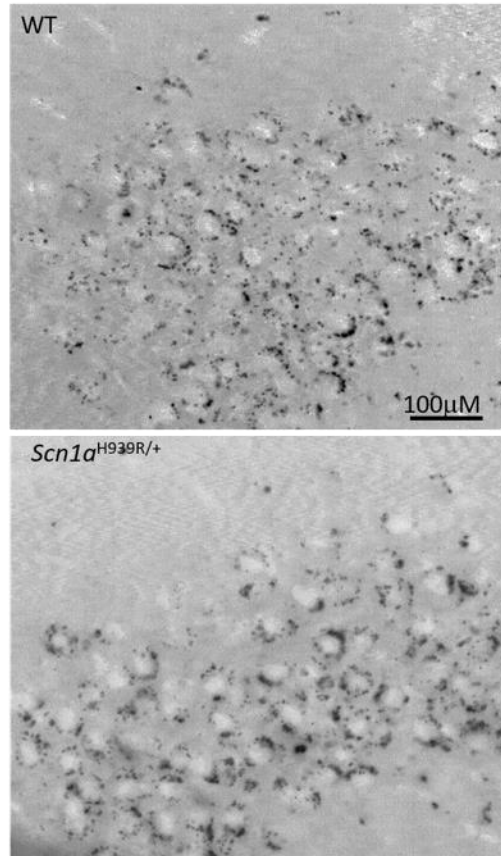

**Figure S1.** (A) Western blot depicting Nav1.1 protein levels in *Scn1a*<sup>H939R/+</sup> mice compared to controls (n=3 per genotype). (B) Inverse image of immunofluorescence showing the distribution of Nav1.1 in *Scn1a*<sup>H939R/+</sup> mice compared to controls. There is not size, expression or localization differences in male *Scn1a*<sup>H939R/+</sup> compared to control mice (n=3 per genotype).
